# Supplementary material for: TLC-Based Metabolite Profiling and Bioactivity-Based Scientific Validation for Use of Water Extracts in AYUSH Formulations
Source: Hindawi journal article supplement (doi:10.1155/2021/2847440), 2021-12-31
Supplement: f1 [file 2847440.f1.zip]

**Supplementary table S2:** Correlation matrix (Pearson n) of variables.

| Variables                | <i>(P. emblica-WE)</i> | <i>(P. emblica-EE)</i> | <i>(P. emblica-HEE)</i> | <i>(P. nigrum-WE)</i> | <i>(P. nigrum-EE)</i> | <i>(P. nigrum-HEE)</i> | <i>(T. cordifolia-WE)</i> | <i>(T. cordifolia-EE)</i> | <i>(T. cordifolia-HEE)</i> | <i>(W. somnifera-WE)</i> | <i>(W. somnifera-EE)</i> | <i>(W. somnifera-HEE)</i> | <i>(A. indica-WE)</i> | <i>(A. indica-EE)</i> | <i>(A. indica-HEE)</i> | <i>(C. longa-WE)</i> | <i>(C. longa-EE)</i> | <i>(C. longa-HEE)</i> | <i>(O. sanctum-WE)</i> | <i>(O. sanctum-EE)</i> | <i>(O. sanctum-HEE)</i> | <i>(A. millefolium-WE)</i> | <i>(A. millefolium-EE)</i> | <i>(A. millefolium-HEE)</i> |
|--------------------------|------------------------|------------------------|-------------------------|-----------------------|-----------------------|------------------------|---------------------------|---------------------------|----------------------------|--------------------------|--------------------------|---------------------------|-----------------------|-----------------------|------------------------|----------------------|----------------------|-----------------------|------------------------|------------------------|-------------------------|----------------------------|----------------------------|-----------------------------|
| <i>P. emblica-WE</i>     | 1                      | 0.843                  | 0.256                   | 0.061                 | 0.059                 | -0.08                  | 0.354                     | 0.081                     | -0.07                      | 0.18                     | -0.03                    | -0.07                     | 0.304                 | -0.04                 | -0.06                  | -0.07                | -0.07                | -0.08                 | 0.284                  | 0.263                  | -0.09                   | -0.04                      | 0.36                       | -0.07                       |
| <i>P. emblica-EE</i>     |                        | 1                      | 0.238                   | 0.059                 | 0.071                 | -0.08                  | 0.394                     | 0.052                     | -0.11                      | 0.147                    | -0.05                    | -0.04                     | 0.258                 | -0.08                 | -0.08                  | -0.06                | -0.07                | -0.08                 | 0.166                  | 0.152                  | -0.1                    | -0.05                      | 0.362                      | -0.07                       |
| <i>P. emblica-HEE</i>    |                        |                        | 1                       | 0.054                 | -0.02                 | 0.009                  | 0.33                      | 0.052                     | -0.07                      | 0.126                    | -0.04                    | -0.06                     | 0.232                 | -0.06                 | -0.07                  | -0.02                | -0.01                | -0.06                 | 0.102                  | 0.076                  | -0.05                   | -0.04                      | 0.346                      | -0.03                       |
| <i>P. nigrum-WE</i>      |                        |                        |                         | 1                     | -0.02                 | 0.089                  | 0.147                     | -0.02                     | -0.06                      | 0.025                    | -0.07                    | -0.03                     | 0.073                 | 0.06                  | -0.06                  | -0.06                | 0.354                | -0.08                 | 0.079                  | 0.043                  | -0.09                   | 0.145                      | 0.196                      | -0.06                       |
| <i>P. nigrum-EE</i>      |                        |                        |                         |                       | 1                     | -0.07                  | 0.107                     | 0.115                     | 0.027                      | 0.26                     | 0.139                    | 0.256                     | 0.303                 | 0.103                 | -0.02                  | -0.06                | -0.06                | -0                    | 0.249                  | 0.286                  | -0.04                   | -0.04                      | -0.01                      | 0.052                       |
| <i>P. nigrum-HEE</i>     |                        |                        |                         |                       |                       | 1                      | -0.04                     | -0.07                     | 0.343                      | -0.03                    | -0.05                    | 0.135                     | -0.05                 | -0.05                 | 0.03                   | 0.162                | 0.67                 | -0.02                 | -0.07                  | -0.09                  | 0.261                   | 0.091                      | 0.534                      | 0.126                       |
| <i>T. cordifolia-WE</i>  |                        |                        |                         |                       |                       |                        | 1                         | 0.131                     | -0.09                      | 0.3                      | -0.01                    | -0.04                     | 0.438                 | -0.04                 | -0.02                  | 0.107                | -0.06                | -0.05                 | 0.257                  | 0.183                  | -0.07                   | -0.04                      | 0.45                       | -0.05                       |
| <i>T. cordifolia-EE</i>  |                        |                        |                         |                       |                       |                        |                           | 1                         | -0.06                      | 0.555                    | 0.32                     | 0.052                     | 0.5                   | 0.622                 | 0.184                  | -0.06                | 0.066                | 0.211                 | 0.144                  | 0.187                  | -0.1                    | -0.01                      | 0.081                      | 0.05                        |
| <i>T. cordifolia-HEE</i> |                        |                        |                         |                       |                       |                        |                           |                           | 1                          | -0.09                    | -0.08                    | 0.171                     | -0.09                 | -0.07                 | 0.089                  | 0.085                | 0.251                | 0.125                 | -0.14                  | -0.1                   | 0.396                   | 0.291                      | 0.1                        | 0.365                       |

|                          |  |  |  |  |  |  |  |  |  |  |          |          |          |          |          |          |          |          |          |          |          |          |       |       |       |
|--------------------------|--|--|--|--|--|--|--|--|--|--|----------|----------|----------|----------|----------|----------|----------|----------|----------|----------|----------|----------|-------|-------|-------|
| <i>W. somnifera</i> -WE  |  |  |  |  |  |  |  |  |  |  | <b>1</b> | 0.489    | 0.009    | 0.517    | 0.647    | -0.03    | -0.06    | 0.138    | 0.39     | 0.167    | 0.148    | -0.06    | -0.04 | 0.182 | -0.01 |
| <i>W. somnifera</i> -EE  |  |  |  |  |  |  |  |  |  |  |          | <b>1</b> | 0.327    | -0.05    | 0.613    | 0.262    | -0.07    | 0.122    | 0.357    | -0.01    | 0.061    | -0.1     | 0     | -0.06 | -0.06 |
| <i>W. somnifera</i> -HEE |  |  |  |  |  |  |  |  |  |  |          |          | <b>1</b> | 0.099    | 0.249    | 0.676    | 0.101    | 0.01     | -0.04    | -0.03    | 0.018    | 0.238    | -0.01 | 0.026 | 0.007 |
| <i>A. indica</i> -WE     |  |  |  |  |  |  |  |  |  |  |          |          |          | <b>1</b> | 0.381    | 0.007    | -0.06    | -0.06    | -0.05    | 0.349    | 0.339    | -0.08    | -0.05 | 0.319 | 0.113 |
| <i>A. indica</i> -EE     |  |  |  |  |  |  |  |  |  |  |          |          |          |          | <b>1</b> | 0.181    | -0.06    | 0.14     | 0.344    | 0.091    | 0.112    | -0.09    | -0.01 | -0.05 | 0.082 |
| <i>A. indica</i> -HEE    |  |  |  |  |  |  |  |  |  |  |          |          |          |          |          | <b>1</b> | 0.086    | -0.07    | -0.04    | -0       | 0.052    | 0.204    | -0.01 | -0.08 | -0.07 |
| <i>C. longa</i> -WE      |  |  |  |  |  |  |  |  |  |  |          |          |          |          |          |          | <b>1</b> | 0.082    | 0.355    | 0        | -0.07    | 0.135    | -0.04 | 0.043 | 0.025 |
| <i>C. longa</i> -EE      |  |  |  |  |  |  |  |  |  |  |          |          |          |          |          |          |          | <b>1</b> | 0.133    | -0.08    | -0.08    | 0.043    | 0.008 | 0.45  | -0.02 |
| <i>C. longa</i> -HEE     |  |  |  |  |  |  |  |  |  |  |          |          |          |          |          |          |          |          | <b>1</b> | -0.11    | -0.09    | -0.07    | -0.03 | -0.04 | -0.03 |
| <i>O. sanctum</i> -WE    |  |  |  |  |  |  |  |  |  |  |          |          |          |          |          |          |          |          |          | <b>1</b> | 0.86     | -0.09    | -0.06 | 0.178 | -0.06 |
| <i>O. sanctum</i> -EE    |  |  |  |  |  |  |  |  |  |  |          |          |          |          |          |          |          |          |          |          | <b>1</b> | -0.11    | -0.01 | 0.124 | -0.09 |
| <i>O. sanctum</i> -HEE   |  |  |  |  |  |  |  |  |  |  |          |          |          |          |          |          |          |          |          |          |          | <b>1</b> | 0.367 | -0.05 | 0.501 |

[illegible]
