# Supplementary material for: TLC-Based Metabolite Profiling and Bioactivity-Based Scientific Validation for Use of Water Extracts in AYUSH Formulations
Source: Hindawi journal article supplement (doi:10.1155/2021/2847440), 2021-12-31
Supplement: f1 [file 2847440.f1.zip]

**Supplementary Table S1 A:** TLC profile of all three extract of different plant materials scanned at 254 nm.

| Plant       |         | <i>P. emblica</i> |        |         | <i>P. nigrum</i> |        |         | <i>T. cordifolia</i> |        |         | <i>W. somnifera</i> |        |         | <i>A. indica</i> |        |         | <i>C. longa</i> |        |         | <i>O. sanctum</i> |        |         | <i>A. millefolium</i> |        |         |
|-------------|---------|-------------------|--------|---------|------------------|--------|---------|----------------------|--------|---------|---------------------|--------|---------|------------------|--------|---------|-----------------|--------|---------|-------------------|--------|---------|-----------------------|--------|---------|
| Metabolites | Extract | W<br>E            | E<br>E | HE<br>E | W<br>E           | E<br>E | HE<br>E | W<br>E               | E<br>E | HE<br>E | W<br>E              | E<br>E | HE<br>E | W<br>E           | E<br>E | HE<br>E | W<br>E          | E<br>E | HE<br>E | W<br>E            | E<br>E | HE<br>E | W<br>E                | E<br>E | HE<br>E |
|             | Rf      |                   |        |         |                  |        |         |                      |        |         |                     |        |         |                  |        |         |                 |        |         |                   |        |         |                       |        |         |
| M1          | 0.02    | -                 | 567.1  | 813.1   | -                | 459.5  | -       | 394.2                | -      | 1555    | -                   | -      | -       | 239.5            | -      | -       | -               | -      | -       | -                 | 785.1  | -       | -                     | -      | -       |
| M2          | 0.04    | -                 | -      | -       | 159              | -      | -       | -                    | 348    | -       | 286                 | 225    | -       | 539              | 249    | -       | 110             | -      | -       | 965               | -      | 831     | -                     | -      | -       |
| M3          | 0.05    | -                 | 1862   | -       | -                | -      | 203.8   | 1085                 | 1152   | -       | -                   | -      | -       | -                | -      | -       | -               | -      | -       | -                 | -      | -       | -                     | -      | -       |
| M4          | 0.08    | 1277              | 1491   | -       | -                | -      | -       | -                    | 362    | -       | -                   | -      | -       | -                | -      | -       | -               | -      | -       | -                 | -      | -       | -                     | -      | -       |
| M5          | 0.1     | -                 | 336    | -       | 276.6            | -      | -       | -                    | -      | -       | -                   | -      | -       | -                | -      | 160.6   | -               | -      | -       | 1943              | 2307   | -       | -                     | 533.3  | -       |
| M6          | 0.11    | -                 | -      | -       | -                | -      | -       | -                    | -      | 183     | -                   | -      | -       | 481              | -      | 178     | -               | -      | -       | -                 | -      | 735     | -                     | -      | -       |
| M7          | 0.13    | -                 | -      | -       | -                | -      | -       | -                    | -      | -       | -                   | -      | -       | -                | -      | -       | -               | -      | -       | -                 | 177    | -       | -                     | -      | -       |
| M8          | 0.16    | -                 | -      | -       | -                | -      | 264     | -                    | -      | 376     | -                   | -      | -       | -                | -      | -       | -               | -      | -       | -                 | -      | 157     | -                     | -      | -       |
| M9          | 0.19    | -                 | 1935   | -       | -                | -      | -       | -                    | -      | -       | -                   | -      | -       | 402.8            | -      | -       | -               | -      | -       | 322.7             | 392.3  | -       | -                     | -      | -       |



| M34    | M33   | M32  | M31   | M30  | M29   | M28   | M27   | M26    | M25    | M24  | M23  |
|--------|-------|------|-------|------|-------|-------|-------|--------|--------|------|------|
| 0.56   | 0.55  | 0.54 | 0.53  | 0.52 | 0.51  | 0.5   | 0.49  | 0.48   | 0.47   | 0.44 | 0.43 |
| -      | -     | -    | -     | -    | -     | -     | -     | 20908  | -      | -    | -    |
| -      | -     | -    | -     | -    | -     | -     | -     | 15579  | -      | -    | -    |
| -      | -     | -    | 400.1 | -    | -     | -     | -     | 4043.5 | -      | -    | -    |
| -      | -     | -    | -     | -    | -     | -     | 1068  | -      | -      | -    | -    |
| -      | -     | -    | -     | -    | 8562  | -     | -     | -      | -      | -    | -    |
| 12617  | -     | -    | -     | -    | -     | -     | -     | -      | -      | 7602 | -    |
| -      | -     | 2773 | -     | -    | -     | -     | -     | -      | -      | 2155 | -    |
| -      | -     | -    | -     | -    | -     | -     | -     | -      | -      | -    | -    |
| 8449.2 | -     | 4680 | -     | -    | -     | -     | -     | -      | 11255  | -    | -    |
| -      | -     | -    | -     | -    | 1126  | -     | -     | -      | -      | -    | -    |
| -      | -     | -    | 2564  | -    | -     | -     | 964.2 | -      | -      | 1726 | -    |
| -      | -     | -    | 1128  | -    | -     | 910.7 | -     | -      | 1283.8 | -    | -    |
| -      | -     | -    | 1700  | -    | -     | -     | -     | -      | -      | -    | -    |
| -      | -     | -    | -     | -    | -     | -     | -     | -      | -      | 1742 | -    |
| -      | -     | -    | -     | -    | -     | -     | 4711  | -      | -      | -    | -    |
| -      | 38198 | -    | -     | -    | -     | -     | -     | -      | -      | -    | -    |
| 44679  | -     | -    | -     | -    | -     | -     | -     | -      | -      | -    | -    |
| -      | -     | -    | -     | 8449 | -     | --    | -     | -      | 12431  | -    | -    |
| -      | -     | -    | -     | -    | -     | -     | -     | -      | -      | -    | 5818 |
| -      | -     | -    | -     | -    | -     | -     | -     | -      | -      | -    | 8056 |
| 6897.6 | -     | -    | -     | -    | -     | 4186  | -     | -      | -      | -    | 1258 |
| -      | -     | -    | -     | -    | 640.6 | -     | -     | -      | -      | -    | -    |
| -      | -     | -    | -     | -    | -     | -     | -     | 2385   | -      | -    | -    |
| -      | -     | -    | -     | -    | -     | 6924  | -     | -      | -      | 1908 | -    |



| M58    | M57    | M56  | M55  | M54   | M53    | M52   | M51  | M50  | M49  | M48  | M47    |
|--------|--------|------|------|-------|--------|-------|------|------|------|------|--------|
| 0.84   | 0.83   | 0.81 | 0.79 | 0.77  | 0.76   | 0.75  | 0.74 | 0.73 | 0.72 | 0.71 | 0.7    |
| -      | -      | -    | -    | -     | -      | -     | 7161 | -    | -    | -    | -      |
| -      | -      | -    | -    | -     | -      | -     | -    | 3092 | -    | -    | 3923.8 |
| -      | -      | -    | -    | -     | -      | -     | -    | -    | -    | 4284 | -      |
| -      | -      | -    | -    | -     | 7423.3 | -     | -    | -    | -    | -    | -      |
| -      | -      | -    | -    | 29910 | -      | -     | -    | -    | -    | -    | 49632  |
| -      | 7990.3 | -    | -    | -     | -      | -     | -    | -    | 7274 | -    | -      |
| -      | -      | -    | -    | -     | -      | -     | -    | 2024 | -    | -    | -      |
| 9910.7 | -      | -    | -    | -     | -      | -     | -    | -    | -    | -    | -      |
| -      | 6312   | -    | -    | 7144  | -      | -     | -    | -    | -    | -    | -      |
| 6163.6 | -      | -    | -    | -     | -      | -     | -    | 2572 | -    | -    | -      |
| 9455   | -      | -    | -    | -     | -      | -     | 2899 | -    | -    | -    | 3561.1 |
| -      | 7949.6 | -    | -    | -     | -      | 2047  | -    | -    | -    | -    | 4798.1 |
| -      | -      | -    | -    | -     | -      | -     | -    | 2261 | -    | -    | -      |
| 10810  | -      | -    | -    | -     | -      | -     | -    | -    | -    | -    | -      |
| -      | 8334.9 | -    | -    | -     | -      | 2410  | -    | -    | -    | -    | -      |
| -      | 34312  | -    | 7622 | -     | -      | 10119 | -    | -    | -    | -    | -      |
| 35377  | -      | -    | 8840 | -     | 11314  | -     | -    | -    | -    | -    | -      |
| 25719  | -      | -    | -    | 6629  | -      | -     | -    | -    | 5835 | -    | -      |
| -      | -      | 8048 | -    | -     | -      | -     | 7502 | -    | -    | -    | 7028.9 |
| -      | -      | 9462 | 5945 | -     | -      | -     | 7754 | -    | -    | -    | 9090.5 |
| -      | 8489.1 | -    | -    | -     | -      | 3636  | -    | -    | -    | 4314 | -      |
| -      | -      | -    | -    | -     | 19105  | -     | -    | -    | -    | -    | -      |
| -      | -      | -    | -    | -     | -      | -     | -    | -    | -    | 6200 | -      |
| -      | -      | -    | -    | 4786  | -      | -     | -    | -    | -    | 5489 | -      |

| Total<br>Number<br>of<br>Metabolites | M63  | M62    | M61    | M60  | M59  |
|--------------------------------------|------|--------|--------|------|------|
|                                      | 0.96 | 0.88   | 0.87   | 0.86 | 0.85 |
| 9                                    | -    | -      | 16259  | -    | -    |
| 13                                   | -    | -      | 19664  | -    | -    |
| 12                                   | 240  | -      | 21336  | -    | -    |
| 12                                   | 802  | -      | 5176.7 | -    | 6273 |
| 10                                   | -    | -      | 6547.1 | -    | 7852 |
| 11                                   | -    | 9589.5 | -      | -    | -    |
| 11                                   | -    | -      | 9136.8 | -    | -    |
| 11                                   | -    | -      | 4819.6 | -    | -    |
| 14                                   | -    | 9601.5 | -      | -    | -    |
| 7                                    | -    | -      | 3205.9 | -    | -    |
| 11                                   | -    | -      | -      | 4771 | -    |
| 11                                   | -    | -      | -      | 8717 | -    |
| 11                                   | -    | -      | 9198.3 | -    | -    |
| 9                                    | -    | -      | -      | 4243 | -    |
| 11                                   | -    | -      | -      | 8884 | -    |
| 8                                    | -    | -      | -      | -    | -    |
| 6                                    | -    | -      | -      | -    | -    |
| 8                                    | -    | -      | -      | -    | -    |
| 11                                   | -    | -      | 13405  | -    | -    |
| 12                                   | -    | -      | 15044  | -    | -    |
| 13                                   | -    | 10495  | -      | -    | -    |
| 3                                    | -    | 24722  | -      | -    | -    |
| 8                                    | -    | -      | 22347  | -    | -    |
| 8                                    | -    | 26524  | -      | -    | -    |
