# Supplementary material for: TLC-Based Metabolite Profiling and Bioactivity-Based Scientific Validation for Use of Water Extracts in AYUSH Formulations
Source: Hindawi journal article supplement (doi:10.1155/2021/2847440), 2021-12-31
Supplement: f1 [file 2847440.f1.zip]

## SUPPORTIVE INFORMATIONS

**Table S1 A:** TLC profile of all three extract of different plant materials scanned at 254 nm.

| Plant       |         | <i>P. emblica</i> |        |         | <i>P. nigrum</i> |        |         | <i>T. cordifolia</i> |        |         | <i>W. somnifera</i> |        |         | <i>A. indica</i> |        |         | <i>C. longa</i> |        |         | <i>O. sanctum</i> |        |         | <i>A. millefolium</i> |        |         |
|-------------|---------|-------------------|--------|---------|------------------|--------|---------|----------------------|--------|---------|---------------------|--------|---------|------------------|--------|---------|-----------------|--------|---------|-------------------|--------|---------|-----------------------|--------|---------|
| Metabolites | Extract | W<br>E            | E<br>E | HE<br>E | W<br>E           | E<br>E | HE<br>E | W<br>E               | E<br>E | HE<br>E | W<br>E              | E<br>E | HE<br>E | W<br>E           | E<br>E | HE<br>E | W<br>E          | E<br>E | HE<br>E | W<br>E            | E<br>E | HE<br>E | W<br>E                | E<br>E | HE<br>E |
|             | Rf      |                   |        |         |                  |        |         |                      |        |         |                     |        |         |                  |        |         |                 |        |         |                   |        |         |                       |        |         |
| M1          | 0.02    | -                 | 567.1  | 813.1   | -                | 459.5  | -       | 394.2                | -      | 1555    | -                   | -      | -       | 239.5            | -      | -       | -               | -      | -       | -                 | 785.1  | -       | -                     | -      | -       |
| M2          | 0.04    | -                 | -      | -       | 159              | -      | -       | -                    | 348    | -       | 286                 | 225    | -       | 539              | 249    | -       | 110             | -      | -       | 965               | -      | 831     | -                     | -      | -       |
| M3          | 0.05    | -                 | 1862   | -       | -                | -      | 203.8   | 1085                 | 1152   | -       | -                   | -      | -       | -                | -      | -       | -               | -      | -       | -                 | -      | -       | -                     | -      | -       |
| M4          | 0.08    | 1277              | 1491   | -       | -                | -      | -       | -                    | 362    | -       | -                   | -      | -       | -                | -      | -       | -               | -      | -       | -                 | -      | -       | -                     | -      | -       |
| M5          | 0.1     | -                 | 336    | -       | 276.6            | -      | -       | -                    | -      | -       | -                   | -      | -       | -                | -      | 160.6   | -               | -      | -       | 1943              | 2307   | -       | -                     | 533.3  | -       |
| M6          | 0.11    | -                 | -      | -       | -                | -      | -       | -                    | -      | 183     | -                   | -      | -       | 481              | -      | 178     | -               | -      | -       | -                 | -      | 735     | -                     | -      | -       |
| M7          | 0.13    | -                 | -      | -       | -                | -      | -       | -                    | -      | -       | -                   | -      | -       | -                | -      | -       | -               | -      | -       | -                 | 177    | -       | -                     | -      | -       |
| M8          | 0.16    | -                 | -      | -       | -                | -      | 264     | -                    | -      | 376     | -                   | -      | -       | -                | -      | -       | -               | -      | -       | -                 | -      | 157     | -                     | -      | -       |
| M9          | 0.19    | -                 | 1935   | -       | -                | -      | -       | -                    | -      | -       | -                   | -      | -       | 402.8            | -      | -       | -               | -      | -       | 322.7             | 392.3  | -       | -                     | -      | -       |



| M34    | M33   | M32  | M31   | M30  | M29   | M28   | M27   | M26    | M25    | M24  | M23  |
|--------|-------|------|-------|------|-------|-------|-------|--------|--------|------|------|
| 0.56   | 0.55  | 0.54 | 0.53  | 0.52 | 0.51  | 0.5   | 0.49  | 0.48   | 0.47   | 0.44 | 0.43 |
| -      | -     | -    | -     | -    | -     | -     | -     | 20908  | -      | -    | -    |
| -      | -     | -    | -     | -    | -     | -     | -     | 15579  | -      | -    | -    |
| -      | -     | -    | 400.1 | -    | -     | -     | -     | 4043.5 | -      | -    | -    |
| -      | -     | -    | -     | -    | -     | -     | 1068  | -      | -      | -    | -    |
| -      | -     | -    | -     | -    | 8562  | -     | -     | -      | -      | -    | -    |
| 12617  | -     | -    | -     | -    | -     | -     | -     | -      | -      | 7602 | -    |
| -      | -     | 2773 | -     | -    | -     | -     | -     | -      | -      | 2155 | -    |
| -      | -     | -    | -     | -    | -     | -     | -     | -      | -      | -    | -    |
| 8449.2 | -     | 4680 | -     | -    | -     | -     | -     | -      | 11255  | -    | -    |
| -      | -     | -    | -     | -    | 1126  | -     | -     | -      | -      | -    | -    |
| -      | -     | -    | 2564  | -    | -     | -     | 964.2 | -      | -      | 1726 | -    |
| -      | -     | -    | 1128  | -    | -     | 910.7 | -     | -      | 1283.8 | -    | -    |
| -      | -     | -    | 1700  | -    | -     | -     | -     | -      | -      | -    | -    |
| -      | -     | -    | -     | -    | -     | -     | -     | -      | -      | 1742 | -    |
| -      | -     | -    | -     | -    | -     | -     | 4711  | -      | -      | -    | -    |
| -      | 38198 | -    | -     | -    | -     | -     | -     | -      | -      | -    | -    |
| 44679  | -     | -    | -     | -    | -     | -     | -     | -      | -      | -    | -    |
| -      | -     | -    | -     | 8449 | -     | --    | -     | -      | 12431  | -    | -    |
| -      | -     | -    | -     | -    | -     | -     | -     | -      | -      | -    | 5818 |
| -      | -     | -    | -     | -    | -     | -     | -     | -      | -      | -    | 8056 |
| 6897.6 | -     | -    | -     | -    | -     | 4186  | -     | -      | -      | -    | 1258 |
| -      | -     | -    | -     | -    | 640.6 | -     | -     | -      | -      | -    | -    |
| -      | -     | -    | -     | -    | -     | -     | -     | 2385   | -      | -    | -    |
| -      | -     | -    | -     | -    | -     | 6924  | -     | -      | -      | 1908 | -    |



| M58    | M57    | M56  | M55  | M54   | M53    | M52   | M51  | M50  | M49  | M48  | M47    |
|--------|--------|------|------|-------|--------|-------|------|------|------|------|--------|
| 0.84   | 0.83   | 0.81 | 0.79 | 0.77  | 0.76   | 0.75  | 0.74 | 0.73 | 0.72 | 0.71 | 0.7    |
| -      | -      | -    | -    | -     | -      | -     | 7161 | -    | -    | -    | -      |
| -      | -      | -    | -    | -     | -      | -     | -    | 3092 | -    | -    | 3923.8 |
| -      | -      | -    | -    | -     | -      | -     | -    | -    | -    | 4284 | -      |
| -      | -      | -    | -    | -     | 7423.3 | -     | -    | -    | -    | -    | -      |
| -      | -      | -    | -    | 29910 | -      | -     | -    | -    | -    | -    | 49632  |
| -      | 7990.3 | -    | -    | -     | -      | -     | -    | -    | 7274 | -    | -      |
| -      | -      | -    | -    | -     | -      | -     | -    | 2024 | -    | -    | -      |
| 9910.7 | -      | -    | -    | -     | -      | -     | -    | -    | -    | -    | -      |
| -      | 6312   | -    | -    | 7144  | -      | -     | -    | -    | -    | -    | -      |
| 6163.6 | -      | -    | -    | -     | -      | -     | -    | 2572 | -    | -    | -      |
| 9455   | -      | -    | -    | -     | -      | -     | 2899 | -    | -    | -    | 3561.1 |
| -      | 7949.6 | -    | -    | -     | -      | 2047  | -    | -    | -    | -    | 4798.1 |
| -      | -      | -    | -    | -     | -      | -     | -    | 2261 | -    | -    | -      |
| 10810  | -      | -    | -    | -     | -      | -     | -    | -    | -    | -    | -      |
| -      | 8334.9 | -    | -    | -     | -      | 2410  | -    | -    | -    | -    | -      |
| -      | 34312  | -    | 7622 | -     | -      | 10119 | -    | -    | -    | -    | -      |
| 35377  | -      | -    | 8840 | -     | 11314  | -     | -    | -    | -    | -    | -      |
| 25719  | -      | -    | -    | 6629  | -      | -     | -    | -    | 5835 | -    | -      |
| -      | -      | 8048 | -    | -     | -      | -     | 7502 | -    | -    | -    | 7028.9 |
| -      | -      | 9462 | 5945 | -     | -      | -     | 7754 | -    | -    | -    | 9090.5 |
| -      | 8489.1 | -    | -    | -     | -      | 3636  | -    | -    | -    | 4314 | -      |
| -      | -      | -    | -    | -     | 19105  | -     | -    | -    | -    | -    | -      |
| -      | -      | -    | -    | -     | -      | -     | -    | -    | -    | 6200 | -      |
| -      | -      | -    | -    | 4786  | -      | -     | -    | -    | -    | 5489 | -      |

| Total<br>Number<br>of<br>Metabolites | M63  | M62    | M61    | M60  | M59  |
|--------------------------------------|------|--------|--------|------|------|
|                                      | 0.96 | 0.88   | 0.87   | 0.86 | 0.85 |
| 9                                    | -    | -      | 16259  | -    | -    |
| 13                                   | -    | -      | 19664  | -    | -    |
| 12                                   | 240  | -      | 21336  | -    | -    |
| 12                                   | 802  | -      | 5176.7 | -    | 6273 |
| 10                                   | -    | -      | 6547.1 | -    | 7852 |
| 11                                   | -    | 9589.5 | -      | -    | -    |
| 11                                   | -    | -      | 9136.8 | -    | -    |
| 11                                   | -    | -      | 4819.6 | -    | -    |
| 14                                   | -    | 9601.5 | -      | -    | -    |
| 7                                    | -    | -      | 3205.9 | -    | -    |
| 11                                   | -    | -      | -      | 4771 | -    |
| 11                                   | -    | -      | -      | 8717 | -    |
| 11                                   | -    | -      | 9198.3 | -    | -    |
| 9                                    | -    | -      | -      | 4243 | -    |
| 11                                   | -    | -      | -      | 8884 | -    |
| 8                                    | -    | -      | -      | -    | -    |
| 6                                    | -    | -      | -      | -    | -    |
| 8                                    | -    | -      | -      | -    | -    |
| 11                                   | -    | -      | 13405  | -    | -    |
| 12                                   | -    | -      | 15044  | -    | -    |
| 13                                   | -    | 10495  | -      | -    | -    |
| 3                                    | -    | 24722  | -      | -    | -    |
| 8                                    | -    | -      | 22347  | -    | -    |
| 8                                    | -    | 26524  | -      | -    | -    |



| C22   | C21   | C20   | C19   | C18  | C17  | C16   | C15   | C14  | C13  | C12  | C11  | C10  |
|-------|-------|-------|-------|------|------|-------|-------|------|------|------|------|------|
| 0.48  | 0.47  | 0.46  | 0.43  | 0.42 | 0.41 | 0.39  | 0.37  | 0.36 | 0.34 | 0.29 | 0.27 | 0.24 |
| 6378  | -     | -     | -     | -    | -    | 11094 | -     | -    | -    | -    | 500  | -    |
| 6773  | -     | -     | -     | -    | -    | 17491 | -     | -    | -    | -    | -    | -    |
| 770.3 | -     | -     | -     | 1024 | -    | -     | -     | 3448 | -    | -    | -    | -    |
| -     | -     | -     | -     | -    | -    | -     | -     | -    | -    | -    | -    | -    |
| -     | -     | 1391  | -     | 2182 | -    | -     | -     | -    | -    | -    | -    | -    |
| -     | -     | 2665  | -     | -    | -    | -     | -     | -    | -    | -    | -    | -    |
| -     | -     | -     | -     | -    | -    | -     | -     | -    | -    | -    | -    | -    |
| -     | -     | -     | -     | -    | -    | -     | -     | -    | -    | -    | -    | -    |
| -     | -     | -     | -     | -    | -    | -     | -     | -    | -    | -    | -    | -    |
| -     | -     | -     | -     | -    | -    | -     | -     | -    | -    | -    | -    | -    |
| -     | -     | -     | -     | -    | -    | -     | -     | -    | -    | -    | -    | -    |
| 859.6 | -     | -     | -     | -    | 947  | -     | 2051  | -    | -    | -    | -    | 805  |
| -     | -     | -     | -     | -    | -    | -     | -     | -    | -    | -    | -    | -    |
| -     | -     | -     | -     | -    | -    | -     | -     | -    | -    | -    | -    | -    |
| -     | -     | 667.1 | -     | -    | -    | -     | -     | -    | -    | -    | -    | -    |
| -     | -     | -     | -     | -    | -    | -     | -     | -    | -    | -    | -    | -    |
| -     | -     | -     | -     | -    | -    | -     | -     | -    | -    | -    | -    | -    |
| -     | 17034 | -     | -     | -    | -    | -     | -     | -    | -    | -    | -    | -    |
| -     | -     | -     | 6774  | -    | -    | -     | -     | -    | -    | -    | -    | -    |
| -     | -     | -     | 7963  | -    | -    | -     | 815.7 | -    | -    | -    | -    | -    |
| -     | -     | -     | 496.6 | -    | -    | -     | -     | -    | -    | -    | 3556 | -    |
| -     | -     | -     | -     | -    | -    | -     | -     | -    | -    | -    | -    | -    |
| 2210  | -     | -     | -     | -    | -    | 650.6 | -     | -    | -    | -    | -    | -    |
| -     | -     | -     | -     | -    | -    | -     | -     | -    | 501  | 511  | -    | -    |



| C34    | C33  | C32    | C31   | C30    | C29  | C28  | C27  | C26   | C25  | C24   | C23  |
|--------|------|--------|-------|--------|------|------|------|-------|------|-------|------|
| 0.61   | 0.6  | 0.59   | 0.58  | 0.56   | 0.55 | 0.54 | 0.53 | 0.52  | 0.51 | 0.5   | 0.49 |
| -      | -    | 4362   | -     | -      | -    | -    | -    | -     | -    | -     | -    |
| -      | -    | 2022.3 | -     | -      | -    | -    | -    | -     | -    | -     | -    |
| -      | -    | -      | -     | -      | -    | -    | -    | -     | -    | -     | -    |
| -      | -    | 985.7  | -     | -      | -    | -    | -    | -     | -    | -     | -    |
| -      | -    | -      | 5903  | -      | -    | -    | -    | -     | 2766 | -     | -    |
| -      | -    | -      | -     | 17335  | -    | -    | -    | -     | -    | 1229  | -    |
| -      | -    | -      | -     | -      | 462  | -    | -    | -     | -    | -     | -    |
| -      | -    | -      | 2300  | -      | -    | -    | -    | -     | -    | -     | -    |
| -      | -    | -      | -     | -      | -    | 5460 | -    | -     | -    | -     | 2647 |
| -      | -    | -      | 629.4 | -      | -    | -    | -    | -     | -    | -     | -    |
| -      | 1594 | -      | -     | -      | -    | -    | -    | -     | -    | -     | -    |
| -      | -    | -      | 452.3 | -      | -    | -    | -    | -     | -    | 371.3 | -    |
| -      | -    | -      | 2796  | -      | -    | -    | -    | -     | -    | -     | -    |
| -      | -    | -      | 2214  | -      | -    | -    | -    | -     | -    | -     | -    |
| -      | -    | -      | -     | 1079.8 | -    | -    | 673  | -     | -    | -     | 1008 |
| 90822  | -    | -      | -     | -      | -    | -    | -    | -     | -    | -     | -    |
| -      | -    | -      | -     | -      | -    | -    | -    | -     | -    | -     | -    |
| 24783  | -    | -      | -     | -      | -    | -    | -    | 12570 | -    | -     | -    |
| -      | -    | 12348  | -     | -      | -    | -    | -    | -     | -    | -     | -    |
| -      | -    | 14800  | -     | -      | -    | -    | -    | -     | -    | -     | -    |
| 1062.6 | -    | -      | -     | 4843.6 | -    | -    | -    | -     | -    | 3782  | -    |
| -      | -    | -      | -     | -      | -    | -    | -    | -     | -    | -     | -    |
| -      | -    | -      | -     | -      | -    | -    | -    | -     | -    | -     | -    |
| -      | -    | -      | 4055  | -      | -    | -    | -    | -     | 9963 | -     | -    |

| C45    | C44  | C43   | C42  | C41    | C40  | C39   | C38    | C37   | C36    | C35    |
|--------|------|-------|------|--------|------|-------|--------|-------|--------|--------|
| 0.75   | 0.74 | 0.73  | 0.71 | 0.7    | 0.69 | 0.68  | 0.67   | 0.66  | 0.64   | 0.62   |
| -      | -    | -     | -    | 2518.3 | -    | -     | -      | -     | 1706.7 | -      |
| -      | -    | 3129  | -    | 1902   | -    | -     | -      | -     | -      | -      |
| -      | -    | -     | 1798 | -      | -    | -     | 900    | -     | -      | 982.3  |
| -      | -    | -     | -    | -      | -    | 15228 | -      | -     | -      | 2511.2 |
| -      | -    | -     | -    | 47531  | -    | -     | -      | -     | 18828  | -      |
| -      | -    | -     | -    | -      | -    | -     | 11323  | -     | -      | 34922  |
| -      | -    | -     | -    | 2002.9 | -    | -     | -      | -     | -      | -      |
| -      | -    | -     | -    | -      | 8567 | -     | -      | -     | 1934.3 | -      |
| -      | -    | 769.8 | -    | -      | 1166 | -     | -      | -     | -      | 2432.6 |
| -      | -    | -     | -    | 2546.3 | -    | -     | -      | -     | -      | -      |
| -      | 1983 | -     | -    | 967    | -    | -     | -      | 1233  | -      | -      |
| -      | -    | -     | -    | 1556.5 | -    | -     | -      | 965.5 | -      | 861.1  |
| -      | -    | -     | -    | 2047.2 | -    | -     | -      | -     | 1974.9 | -      |
| 1446.1 | -    | -     | 2198 | -      | -    | -     | -      | -     | 1323.9 | -      |
| -      | -    | -     | -    | -      | 1483 | -     | -      | -     | 1300   | -      |
| -      | -    | -     | -    | -      | -    | -     | 66994  | -     | -      | -      |
| 12712  | -    | -     | -    | -      | -    | 53910 | -      | -     | -      | 96243  |
| -      | -    | -     | -    | 1182.6 | -    | -     | -      | -     | -      | -      |
| -      | -    | -     | 6747 | -      | -    | -     | 5965.8 | -     | 12531  | -      |
| -      | 5172 | -     | -    | -      | -    | -     | -      | -     | 23174  | -      |
| -      | -    | -     | -    | 1587.3 | -    | -     | 1474.7 | -     | -      | -      |
| -      | -    | -     | -    | -      | -    | -     | -      | -     | -      | -      |
| -      | -    | -     | 5936 | -      | -    | -     | -      | 6526  | -      | 14997  |
| -      | -    | -     | 2657 | -      | -    | -     | 2769.5 | -     | -      | -      |



**Table S2:** Correlation matrix (Pearson n) of variables.

| Variables                | <i>(P. emblica-WE)</i> | <i>(P. emblica-EE)</i> | <i>(P. emblica-HEE)</i> | <i>(P. nigrum-WE)</i> | <i>(P. nigrum-EE)</i> | <i>(P. nigrum-HEE)</i> | <i>(T. cordifolia-WE)</i> | <i>(T. cordifolia-EE)</i> | <i>(T. cordifolia-HEE)</i> | <i>(W. somnifera-WE)</i> | <i>(W. somnifera-EE)</i> | <i>(W. somnifera-HEE)</i> | <i>(A. indica-WE)</i> | <i>(A. indica-EE)</i> | <i>(A. indica-HEE)</i> | <i>(C. longa-WE)</i> | <i>(C. longa-EE)</i> | <i>(C. longa-HEE)</i> | <i>(O. sanctum-WE)</i> | <i>(O. sanctum-EE)</i> | <i>(O. sanctum-HEE)</i> | <i>(A. millefolium-WE)</i> | <i>(A. millefolium-EE)</i> | <i>(A. millefolium-HEE)</i> |
|--------------------------|------------------------|------------------------|-------------------------|-----------------------|-----------------------|------------------------|---------------------------|---------------------------|----------------------------|--------------------------|--------------------------|---------------------------|-----------------------|-----------------------|------------------------|----------------------|----------------------|-----------------------|------------------------|------------------------|-------------------------|----------------------------|----------------------------|-----------------------------|
| <i>P. emblica-WE</i>     | 1                      | 0.843                  | 0.256                   | 0.061                 | 0.059                 | -0.08                  | 0.354                     | 0.081                     | -0.07                      | 0.18                     | -0.03                    | -0.07                     | 0.304                 | -0.04                 | -0.06                  | -0.07                | -0.07                | -0.08                 | 0.284                  | 0.263                  | -0.09                   | -0.04                      | 0.36                       | -0.07                       |
| <i>P. emblica-EE</i>     |                        | 1                      | 0.238                   | 0.059                 | 0.071                 | -0.08                  | 0.394                     | 0.052                     | -0.11                      | 0.147                    | -0.05                    | -0.04                     | 0.258                 | -0.08                 | -0.08                  | -0.06                | -0.07                | -0.08                 | 0.166                  | 0.152                  | -0.1                    | -0.05                      | 0.362                      | -0.07                       |
| <i>P. emblica-HEE</i>    |                        |                        | 1                       | 0.054                 | -0.02                 | 0.009                  | 0.33                      | 0.052                     | -0.07                      | 0.126                    | -0.04                    | -0.06                     | 0.232                 | -0.06                 | -0.07                  | -0.02                | -0.01                | -0.06                 | 0.102                  | 0.076                  | -0.05                   | -0.04                      | 0.346                      | -0.03                       |
| <i>P. nigrum-WE</i>      |                        |                        |                         | 1                     | -0.02                 | 0.089                  | 0.147                     | -0.02                     | -0.06                      | 0.025                    | -0.07                    | -0.03                     | 0.073                 | 0.06                  | -0.06                  | -0.06                | 0.354                | -0.08                 | 0.079                  | 0.043                  | -0.09                   | 0.145                      | 0.196                      | -0.06                       |
| <i>P. nigrum-EE</i>      |                        |                        |                         |                       | 1                     | -0.07                  | 0.107                     | 0.115                     | 0.027                      | 0.26                     | 0.139                    | 0.256                     | 0.303                 | 0.103                 | -0.02                  | -0.06                | -0.06                | -0                    | 0.249                  | 0.286                  | -0.04                   | -0.04                      | -0.01                      | 0.052                       |
| <i>P. nigrum-HEE</i>     |                        |                        |                         |                       |                       | 1                      | -0.04                     | -0.07                     | 0.343                      | -0.03                    | -0.05                    | 0.135                     | -0.05                 | -0.05                 | 0.03                   | 0.162                | 0.67                 | -0.02                 | -0.07                  | -0.09                  | 0.261                   | 0.091                      | 0.534                      | 0.126                       |
| <i>T. cordifolia-WE</i>  |                        |                        |                         |                       |                       |                        | 1                         | 0.131                     | -0.09                      | 0.3                      | -0.01                    | -0.04                     | 0.438                 | -0.04                 | -0.02                  | 0.107                | -0.06                | -0.05                 | 0.257                  | 0.183                  | -0.07                   | -0.04                      | 0.45                       | -0.05                       |
| <i>T. cordifolia-EE</i>  |                        |                        |                         |                       |                       |                        |                           | 1                         | -0.06                      | 0.555                    | 0.32                     | 0.052                     | 0.5                   | 0.622                 | 0.184                  | -0.06                | 0.066                | 0.211                 | 0.144                  | 0.187                  | -0.1                    | -0.01                      | 0.081                      | 0.05                        |
| <i>T. cordifolia-HEE</i> |                        |                        |                         |                       |                       |                        |                           |                           | 1                          | -0.09                    | -0.08                    | 0.171                     | -0.09                 | -0.07                 | 0.089                  | 0.085                | 0.251                | 0.125                 | -0.14                  | -0.1                   | 0.396                   | 0.291                      | 0.1                        | 0.365                       |

|                          |  |  |  |  |  |  |  |  |  |  |          |          |          |          |          |          |          |          |          |          |          |          |       |       |       |
|--------------------------|--|--|--|--|--|--|--|--|--|--|----------|----------|----------|----------|----------|----------|----------|----------|----------|----------|----------|----------|-------|-------|-------|
| <i>W. somnifera</i> -WE  |  |  |  |  |  |  |  |  |  |  | <b>1</b> | 0.489    | 0.009    | 0.517    | 0.647    | -0.03    | -0.06    | 0.138    | 0.39     | 0.167    | 0.148    | -0.06    | -0.04 | 0.182 | -0.01 |
| <i>W. somnifera</i> -EE  |  |  |  |  |  |  |  |  |  |  |          | <b>1</b> | 0.327    | -0.05    | 0.613    | 0.262    | -0.07    | 0.122    | 0.357    | -0.01    | 0.061    | -0.1     | 0     | -0.06 | -0.06 |
| <i>W. somnifera</i> -HEE |  |  |  |  |  |  |  |  |  |  |          |          | <b>1</b> | 0.099    | 0.249    | 0.676    | 0.101    | 0.01     | -0.04    | -0.03    | 0.018    | 0.238    | -0.01 | 0.026 | 0.007 |
| <i>A. indica</i> -WE     |  |  |  |  |  |  |  |  |  |  |          |          |          | <b>1</b> | 0.381    | 0.007    | -0.06    | -0.06    | -0.05    | 0.349    | 0.339    | -0.08    | -0.05 | 0.319 | 0.113 |
| <i>A. indica</i> -EE     |  |  |  |  |  |  |  |  |  |  |          |          |          |          | <b>1</b> | 0.181    | -0.06    | 0.14     | 0.344    | 0.091    | 0.112    | -0.09    | -0.01 | -0.05 | 0.082 |
| <i>A. indica</i> -HEE    |  |  |  |  |  |  |  |  |  |  |          |          |          |          |          | <b>1</b> | 0.086    | -0.07    | -0.04    | -0       | 0.052    | 0.204    | -0.01 | -0.08 | -0.07 |
| <i>C. longa</i> -WE      |  |  |  |  |  |  |  |  |  |  |          |          |          |          |          |          | <b>1</b> | 0.082    | 0.355    | 0        | -0.07    | 0.135    | -0.04 | 0.043 | 0.025 |
| <i>C. longa</i> -EE      |  |  |  |  |  |  |  |  |  |  |          |          |          |          |          |          |          | <b>1</b> | 0.133    | -0.08    | -0.08    | 0.043    | 0.008 | 0.45  | -0.02 |
| <i>C. longa</i> -HEE     |  |  |  |  |  |  |  |  |  |  |          |          |          |          |          |          |          |          | <b>1</b> | -0.11    | -0.09    | -0.07    | -0.03 | -0.04 | -0.03 |
| <i>O. sanctum</i> -WE    |  |  |  |  |  |  |  |  |  |  |          |          |          |          |          |          |          |          |          | <b>1</b> | 0.86     | -0.09    | -0.06 | 0.178 | -0.06 |
| <i>O. sanctum</i> -EE    |  |  |  |  |  |  |  |  |  |  |          |          |          |          |          |          |          |          |          |          | <b>1</b> | -0.11    | -0.01 | 0.124 | -0.09 |
| <i>O. sanctum</i> -HEE   |  |  |  |  |  |  |  |  |  |  |          |          |          |          |          |          |          |          |          |          |          | <b>1</b> | 0.367 | -0.05 | 0.501 |

[illegible]

**Table S3:** Eigenvalues of variables from principle component analysis (PCA).

|                        | <b>F1</b> | <b>F2</b> | <b>F3</b> | <b>F4</b> | <b>F5</b> | <b>F6</b> | <b>F7</b> | <b>F8</b> | <b>F9</b> | <b>F10</b> | <b>F11</b> | <b>F12</b> | <b>F13</b> | <b>F14</b> | <b>F15</b> | <b>F16</b> | <b>F17</b> | <b>F18</b> | <b>F19</b> | <b>F20</b> | <b>F21</b> | <b>F22</b> | <b>F23</b> | <b>F24</b> |
|------------------------|-----------|-----------|-----------|-----------|-----------|-----------|-----------|-----------|-----------|------------|------------|------------|------------|------------|------------|------------|------------|------------|------------|------------|------------|------------|------------|------------|
| <b>Eigenvalue</b>      | 3.9       | 2.96      | 2.63      | 2.04      | 1.71      | 1.52      | 1.3       | 1.08      | 1.01      | 0.92       | 0.83       | 0.66       | 0.59       | 0.55       | 0.43       | 0.37       | 0.32       | 0.24       | 0.21       | 0.19       | 0.16       | 0.14       | 0.13       | 0.1        |
| <b>Variability (%)</b> | 16.24     | 12.32     | 10.98     | 8.491     | 7.114     | 6.342     | 5.431     | 4.502     | 4.222     | 3.848      | 3.457      | 2.734      | 2.477      | 2.287      | 1.777      | 1.554      | 1.35       | 0.989      | 0.886      | 0.795      | 0.685      | 0.563      | 0.527      | 0.429      |
| <b>Cumulative %</b>    | 16.24     | 28.57     | 39.54     | 48.03     | 55.15     | 61.49     | 66.92     | 71.42     | 75.64     | 79.49      | 82.95      | 85.68      | 88.16      | 90.45      | 92.22      | 93.78      | 95.13      | 96.12      | 97         | 97.8       | 98.48      | 99.05      | 99.57      | 100        |

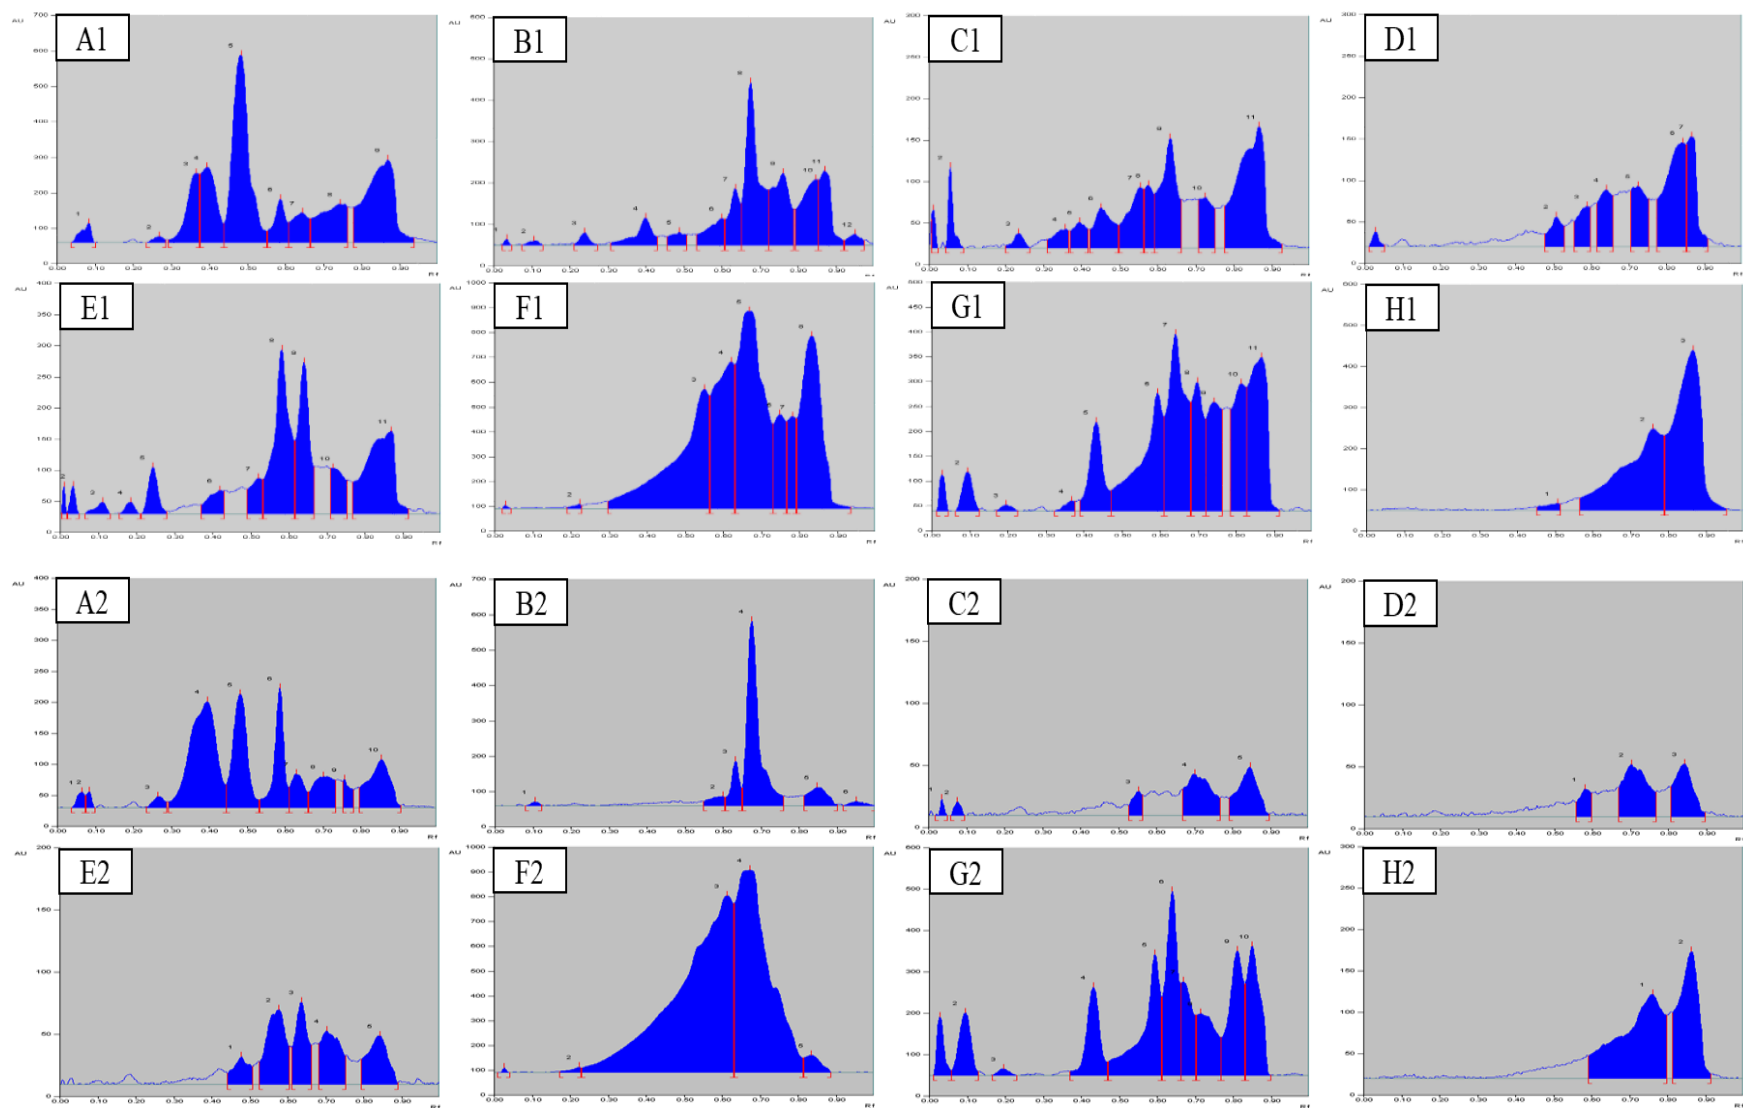

**Figure S1:** Developed thin layer chromatogram of Water Extracts (WE) of *P. emblica* (A1), *P. nigrum* (B1), *T. cordifolia* (C1), *W. somnifera* (D1), *A. indica* (E1), *C. longa* (F1), *O. sanctum* (G1), *A. millefolium* (H1) at 254 nm and *P. emblica* (A2), *P. nigrum* (B2), *T. cordifolia* (C2), *W. somnifera* (D2), *A. indica* (E2), *C. longa* (F2), *O. sanctum* (G2), *A. millefolium* (H2) at 366 nm.



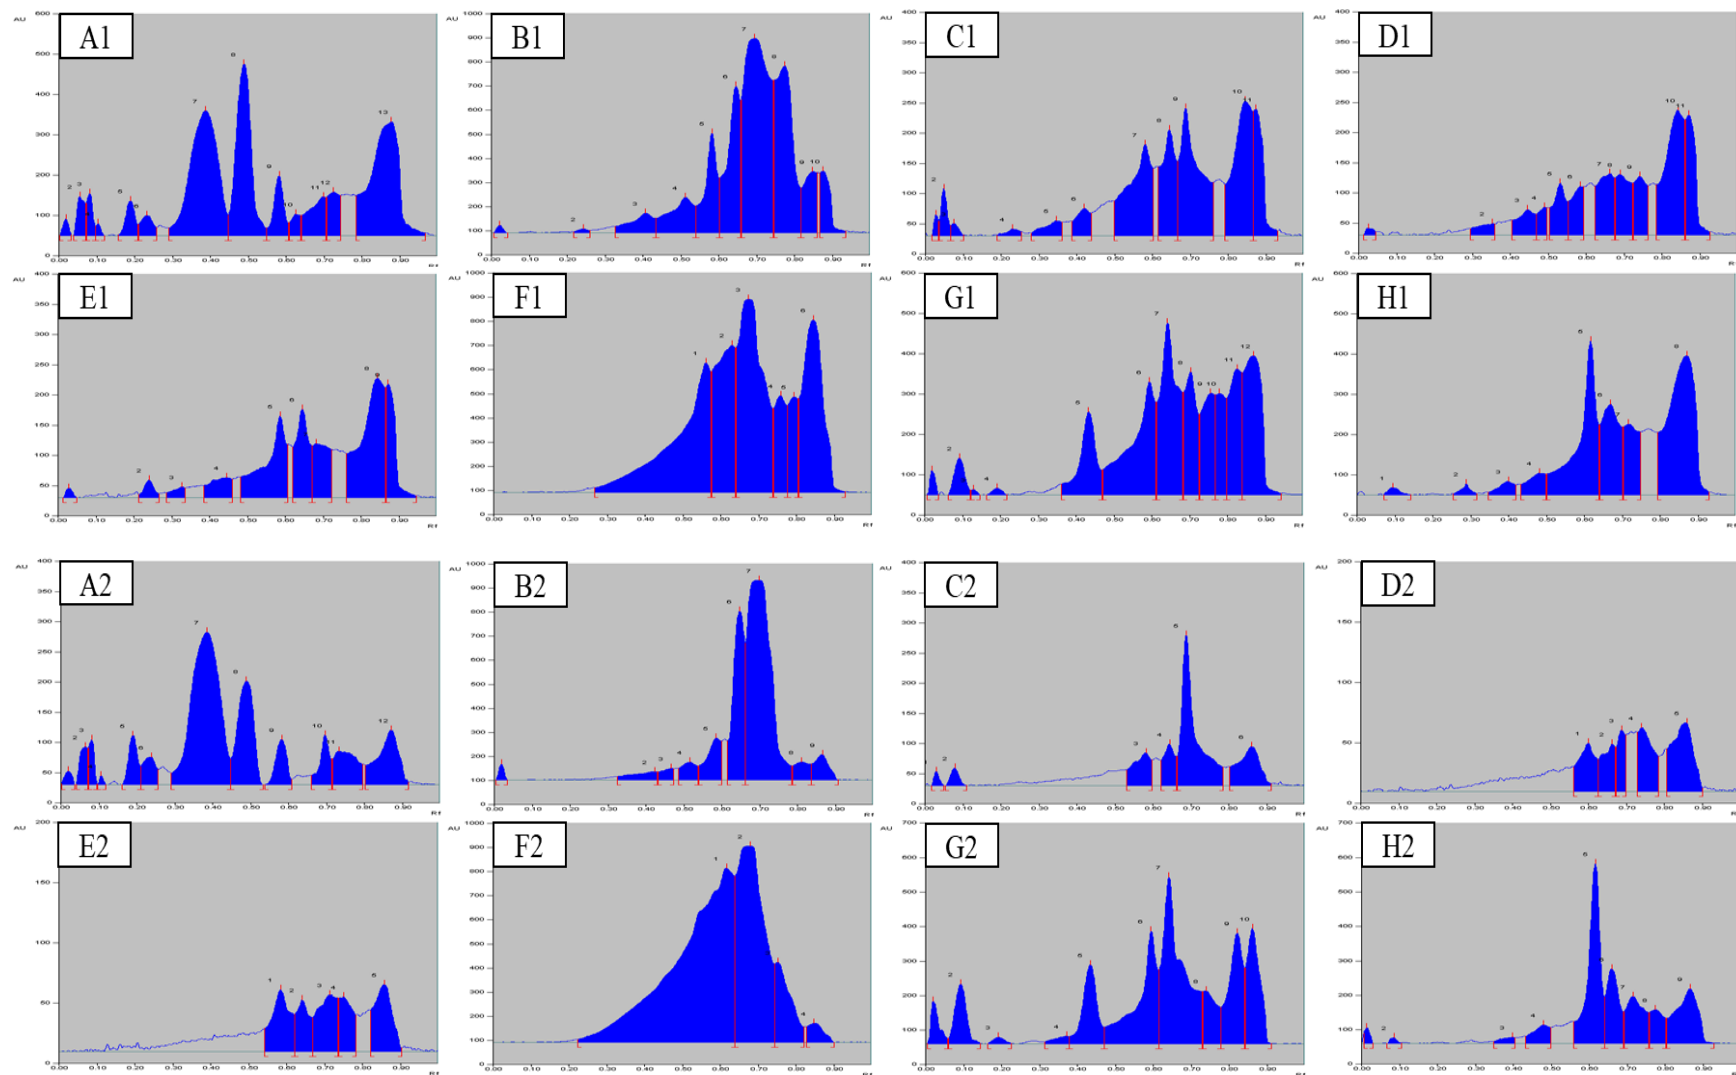

**Figure S2:** Developed thin layer chromatogram of Ethanolic Extracts (EE) of *P. emblica* (A1), *P. nigrum* (B1), *T. cordifolia* (C1), *W. somnifera* (D1), *A. indica* (E1), *C. longa* (F1), *O. sanctum* (G1), *A. millefolium* (H1) at 254 nm and *P. emblica* (A2), *P. nigrum* (B2), *T. cordifolia* (C2), *W. somnifera* (D2), *A. indica* (E2), *C. longa* (F2), *O. sanctum* (G2), *A. millefolium* (H2) at 366 nm.

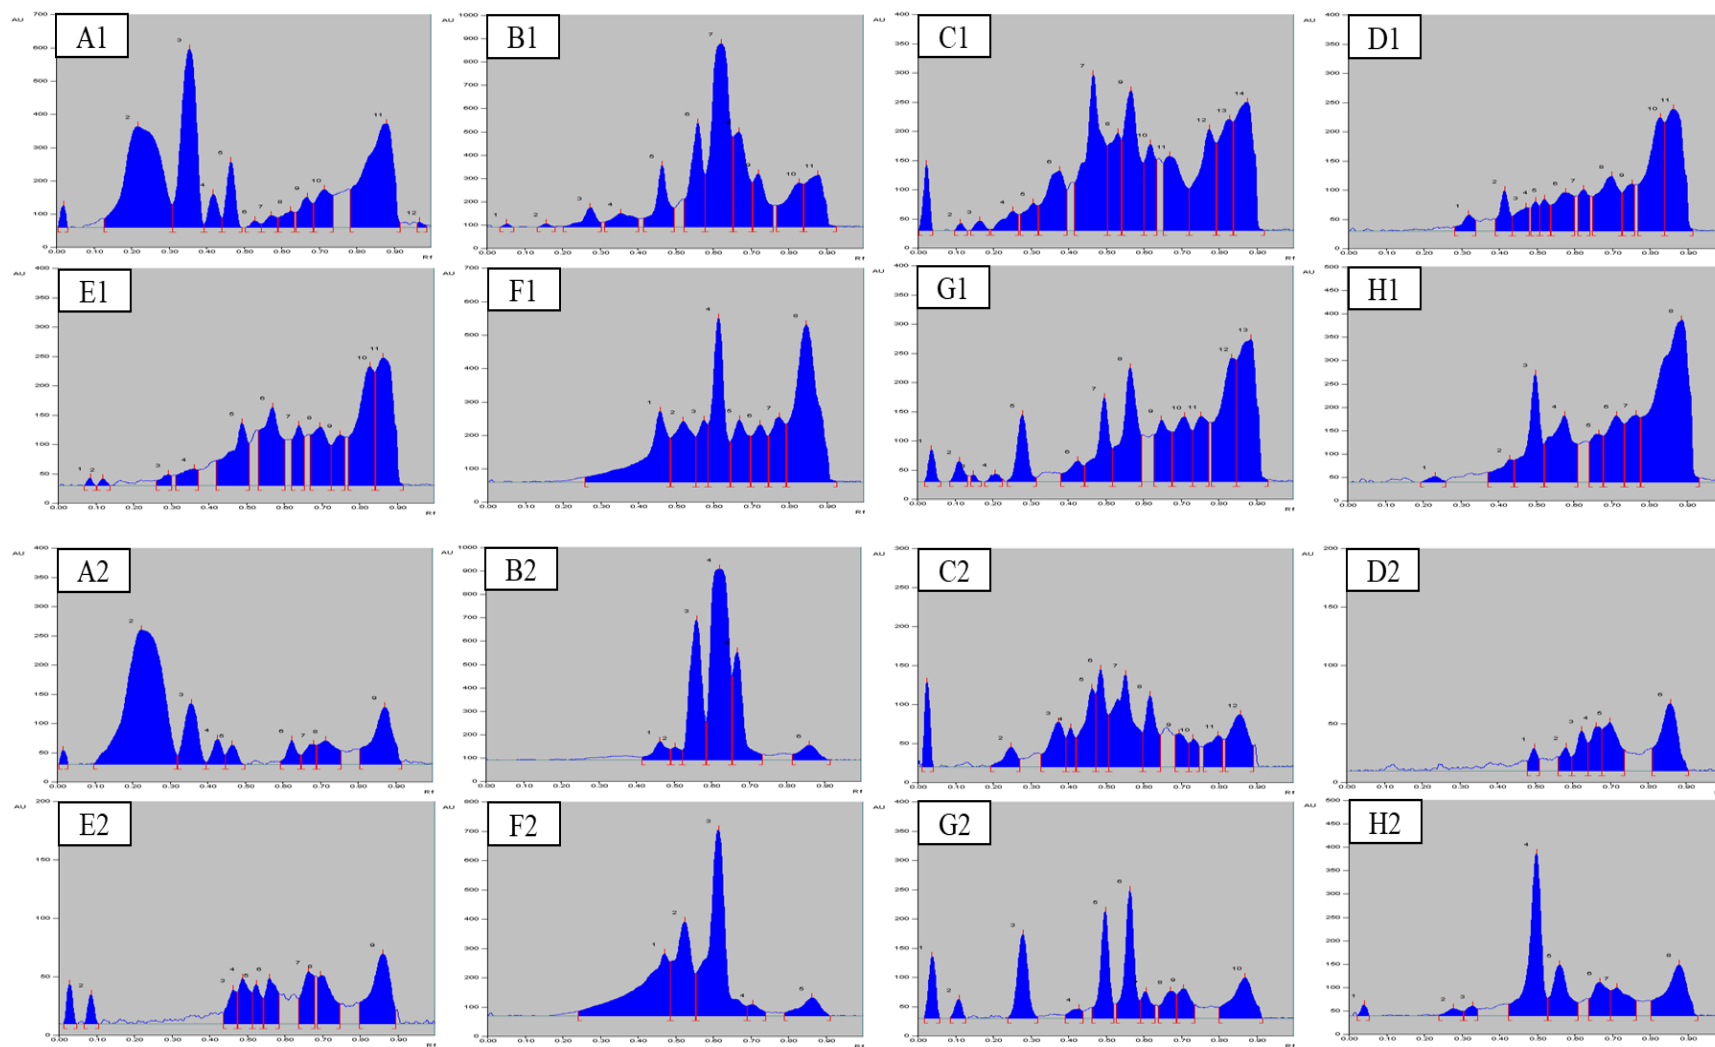

**Figure S3:** Developed thin layer chromatogram of Hydroethanolic Extracts (HEE) of *P. emblica* (A1), *P. nigrum* (B1), *T. cordifolia* (C1), *W. somnifera* (D1), *A. indica* (E1), *C. longa* (F1), *O. sanctum* (G1), *A. millefolium* (H1) at 254 nm and *P. emblica* (A2), *P. nigrum* (B2), *T. cordifolia* (C2), *W. somnifera* (D2), *A. indica* (E2), *C. longa* (F2), *O. sanctum* (G2), *A. millefolium* (H2) at 366 nm.
