# Supplementary material for: TLC-Based Metabolite Profiling and Bioactivity-Based Scientific Validation for Use of Water Extracts in AYUSH Formulations
Source: Hindawi journal article supplement (doi:10.1155/2021/2847440), 2021-12-31
Supplement: f1 [file 2847440.f1.zip]

**Supplementary table S3:** Eigenvalues of variables from principle component analysis (PCA).

|                        | <b>F1</b> | <b>F2</b> | <b>F3</b> | <b>F4</b> | <b>F5</b> | <b>F6</b> | <b>F7</b> | <b>F8</b> | <b>F9</b> | <b>F10</b> | <b>F11</b> | <b>F12</b> | <b>F13</b> | <b>F14</b> | <b>F15</b> | <b>F16</b> | <b>F17</b> | <b>F18</b> | <b>F19</b> | <b>F20</b> | <b>F21</b> | <b>F22</b> | <b>F23</b> | <b>F24</b> |
|------------------------|-----------|-----------|-----------|-----------|-----------|-----------|-----------|-----------|-----------|------------|------------|------------|------------|------------|------------|------------|------------|------------|------------|------------|------------|------------|------------|------------|
| <b>Eigenvalue</b>      | 3.9       | 2.96      | 2.63      | 2.04      | 1.71      | 1.52      | 1.3       | 1.08      | 1.01      | 0.92       | 0.83       | 0.66       | 0.59       | 0.55       | 0.43       | 0.37       | 0.32       | 0.24       | 0.21       | 0.19       | 0.16       | 0.14       | 0.13       | 0.1        |
| <b>Variability (%)</b> | 16.24     | 12.32     | 10.98     | 8.491     | 7.114     | 6.342     | 5.431     | 4.502     | 4.222     | 3.848      | 3.457      | 2.734      | 2.477      | 2.287      | 1.777      | 1.554      | 1.35       | 0.989      | 0.886      | 0.795      | 0.685      | 0.563      | 0.527      | 0.429      |
| <b>Cumulative %</b>    | 16.24     | 28.57     | 39.54     | 48.03     | 55.15     | 61.49     | 66.92     | 71.42     | 75.64     | 79.49      | 82.95      | 85.68      | 88.16      | 90.45      | 92.22      | 93.78      | 95.13      | 96.12      | 97         | 97.8       | 98.48      | 99.05      | 99.57      | 100        |
