# Supplementary material for: TLC-Based Metabolite Profiling and Bioactivity-Based Scientific Validation for Use of Water Extracts in AYUSH Formulations
Source: Hindawi journal article supplement (doi:10.1155/2021/2847440), 2021-12-31
Supplement: f1 [file 2847440.f1.zip]

| C22   | C21   | C20   | C19   | C18  | C17  | C16   | C15   | C14  | C13  | C12  | C11  | C10  |
|-------|-------|-------|-------|------|------|-------|-------|------|------|------|------|------|
| 0.48  | 0.47  | 0.46  | 0.43  | 0.42 | 0.41 | 0.39  | 0.37  | 0.36 | 0.34 | 0.29 | 0.27 | 0.24 |
| 6378  | -     | -     | -     | -    | -    | 11094 | -     | -    | -    | -    | 500  | -    |
| 6773  | -     | -     | -     | -    | -    | 17491 | -     | -    | -    | -    | -    | -    |
| 770.3 | -     | -     | -     | 1024 | -    | -     | -     | 3448 | -    | -    | -    | -    |
| -     | -     | -     | -     | -    | -    | -     | -     | -    | -    | -    | -    | -    |
| -     | -     | 1391  | -     | 2182 | -    | -     | -     | -    | -    | -    | -    | -    |
| -     | -     | 2665  | -     | -    | -    | -     | -     | -    | -    | -    | -    | -    |
| -     | -     | -     | -     | -    | -    | -     | -     | -    | -    | -    | -    | -    |
| -     | -     | 2876  | -     | -    | 947  | -     | 2051  | -    | -    | -    | -    | 805  |
| -     | -     | -     | -     | -    | -    | -     | -     | -    | -    | -    | -    | -    |
| -     | -     | -     | -     | -    | -    | -     | -     | -    | -    | -    | -    | -    |
| -     | -     | -     | -     | -    | -    | -     | -     | -    | -    | -    | -    | -    |
| 859.6 | -     | -     | -     | -    | -    | -     | -     | -    | -    | -    | -    | -    |
| -     | -     | -     | -     | -    | -    | -     | -     | -    | -    | -    | -    | -    |
| -     | -     | 667.1 | -     | -    | -    | -     | -     | -    | -    | -    | -    | -    |
| -     | -     | -     | -     | -    | -    | -     | -     | -    | -    | -    | -    | -    |
| -     | -     | -     | -     | -    | -    | -     | -     | -    | -    | -    | -    | -    |
| -     | 17034 | -     | -     | -    | -    | -     | -     | -    | -    | -    | -    | -    |
| -     | -     | -     | 6774  | -    | -    | -     | -     | -    | -    | -    | -    | -    |
| -     | -     | -     | 7963  | -    | -    | -     | 815.7 | -    | -    | -    | -    | -    |
| -     | -     | -     | 496.6 | -    | -    | -     | -     | -    | -    | -    | 3556 | -    |
| -     | -     | -     | -     | -    | -    | -     | -     | -    | -    | -    | -    | -    |
| 2210  | -     | -     | -     | -    | -    | 650.6 | -     | -    | -    | -    | -    | -    |
| -     | -     | -     | -     | -    | -    | -     | -     | -    | 501  | 511  | -    | -    |

| C34    | C33  | C32    | C31   | C30    | C29  | C28  | C27  | C26   | C25  | C24   | C23  |
|--------|------|--------|-------|--------|------|------|------|-------|------|-------|------|
| 0.61   | 0.6  | 0.59   | 0.58  | 0.56   | 0.55 | 0.54 | 0.53 | 0.52  | 0.51 | 0.5   | 0.49 |
| -      | -    | 4362   | -     | -      | -    | -    | -    | -     | -    | -     | -    |
| -      | -    | 2022.3 | -     | -      | -    | -    | -    | -     | -    | -     | -    |
| -      | -    | -      | -     | -      | -    | -    | -    | -     | -    | -     | -    |
| -      | -    | 985.7  | -     | -      | -    | -    | -    | -     | -    | -     | -    |
| -      | -    | -      | 5903  | -      | -    | -    | -    | -     | 2766 | -     | -    |
| -      | -    | -      | -     | 17335  | -    | -    | -    | -     | -    | 1229  | -    |
| -      | -    | -      | -     | -      | 462  | -    | -    | -     | -    | -     | -    |
| -      | -    | -      | 2300  | -      | -    | -    | -    | -     | -    | -     | -    |
| -      | -    | -      | -     | -      | -    | 5460 | -    | -     | -    | -     | 2647 |
| -      | -    | -      | 629.4 | -      | -    | -    | -    | -     | -    | -     | -    |
| -      | 1594 | -      | -     | -      | -    | -    | -    | -     | -    | -     | -    |
| -      | -    | -      | 452.3 | -      | -    | -    | -    | -     | -    | 371.3 | -    |
| -      | -    | -      | 2796  | -      | -    | -    | -    | -     | -    | -     | -    |
| -      | -    | -      | 2214  | -      | -    | -    | -    | -     | -    | -     | -    |
| -      | -    | -      | -     | 1079.8 | -    | -    | 673  | -     | -    | -     | 1008 |
| 90822  | -    | -      | -     | -      | -    | -    | -    | -     | -    | -     | -    |
| -      | -    | -      | -     | -      | -    | -    | -    | -     | -    | -     | -    |
| 24783  | -    | -      | -     | -      | -    | -    | -    | 12570 | -    | -     | -    |
| -      | -    | 12348  | -     | -      | -    | -    | -    | -     | -    | -     | -    |
| -      | -    | 14800  | -     | -      | -    | -    | -    | -     | -    | -     | -    |
| 1062.6 | -    | -      | -     | 4843.6 | -    | -    | -    | -     | -    | 3782  | -    |
| -      | -    | -      | -     | -      | -    | -    | -    | -     | -    | -     | -    |
| -      | -    | -      | -     | -      | -    | -    | -    | -     | -    | -     | -    |
| -      | -    | -      | 4055  | -      | -    | -    | -    | -     | 9963 | -     | -    |

| C45    | C44  | C43   | C42  | C41    | C40  | C39   | C38    | C37   | C36    | C35    |
|--------|------|-------|------|--------|------|-------|--------|-------|--------|--------|
| 0.75   | 0.74 | 0.73  | 0.71 | 0.7    | 0.69 | 0.68  | 0.67   | 0.66  | 0.64   | 0.62   |
| -      | -    | -     | -    | 2518.3 | -    | -     | -      | -     | 1706.7 | -      |
| -      | -    | 3129  | -    | 1902   | -    | -     | -      | -     | -      | -      |
| -      | -    | -     | 1798 | -      | -    | -     | 900    | -     | -      | 982.3  |
| -      | -    | -     | -    | -      | -    | 15228 | -      | -     | -      | 2511.2 |
| -      | -    | -     | -    | 47531  | -    | -     | -      | -     | 18828  | -      |
| -      | -    | -     | -    | -      | -    | -     | 11323  | -     | -      | 34922  |
| -      | -    | -     | -    | 2002.9 | -    | -     | -      | -     | -      | -      |
| -      | -    | -     | -    | -      | 8567 | -     | -      | -     | 1934.3 | -      |
| -      | -    | 769.8 | -    | -      | 1166 | -     | -      | -     | -      | 2432.6 |
| -      | -    | -     | -    | 2546.3 | -    | -     | -      | -     | -      | -      |
| -      | 1983 | -     | -    | 967    | -    | -     | -      | 1233  | -      | -      |
| -      | -    | -     | -    | 1556.5 | -    | -     | -      | 965.5 | -      | 861.1  |
| -      | -    | -     | -    | 2047.2 | -    | -     | -      | -     | 1974.9 | -      |
| 1446.1 | -    | -     | 2198 | -      | -    | -     | -      | -     | 1323.9 | -      |
| -      | -    | -     | -    | -      | 1483 | -     | -      | -     | 1300   | -      |
| -      | -    | -     | -    | -      | -    | -     | 66994  | -     | -      | -      |
| 12712  | -    | -     | -    | -      | -    | 53910 | -      | -     | -      | 96243  |
| -      | -    | -     | -    | 1182.6 | -    | -     | -      | -     | -      | -      |
| -      | -    | -     | 6747 | -      | -    | -     | 5965.8 | -     | 12531  | -      |
| -      | 5172 | -     | -    | -      | -    | -     | -      | -     | 23174  | -      |
| -      | -    | -     | -    | 1587.3 | -    | -     | 1474.7 | -     | -      | -      |
| -      | -    | -     | -    | -      | -    | -     | -      | -     | -      | -      |
| -      | -    | -     | 5936 | -      | -    | -     | -      | 6526  | -      | 14997  |
| -      | -    | -     | 2657 | -      | -    | -     | 2769.5 | -     | -      | -      |
